# Supplementary material for: Naked antibodies and antibody-drug conjugates: targeted therapy for childhood acute lymphoblastic leukemia
Source: PubMed Central journal article supplement — Haematologica. 2024 Jun 1;109(6):1700–12. doi: 10.3324/haematol.2023.283815 (PMC11141655; doi:10.3324/haematol.2023.283815), 2024-06-01
Supplement: 2023_283815_BRIVIO_SUPPL.pdf [file 2023_283815_BRIVIO_SUPPL.pdf]

# Naked antibodies and antibody-drug conjugates: targeted therapy for childhood acute lymphoblastic leukemia

Erica Brivio,<sup>1</sup> Francisco Bautista<sup>1</sup> and C. Michel Zwaan<sup>1,2</sup>

<sup>1</sup>Princess Máxima Center for Pediatric Oncology, Utrecht and <sup>2</sup>Pediatric Oncology, Erasmus MC-Sophia Children's Hospital, Rotterdam, the Netherlands

**Correspondence:** C.M. Zwaan  
[c.m.zwaan@prinsesmaximacentrum.nl](mailto:c.m.zwaan@prinsesmaximacentrum.nl)

**Received:** November 8, 2023.

**Accepted:** March 15, 2024.

<https://doi.org/10.3324/haematol.2023.283815>

©2024 Ferrata Storti Foundation

Published under a CC BY-NC license

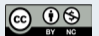

**Supplementary figure 1.** Flow diagram reporting the results of the search at clinicaltrials.gov.

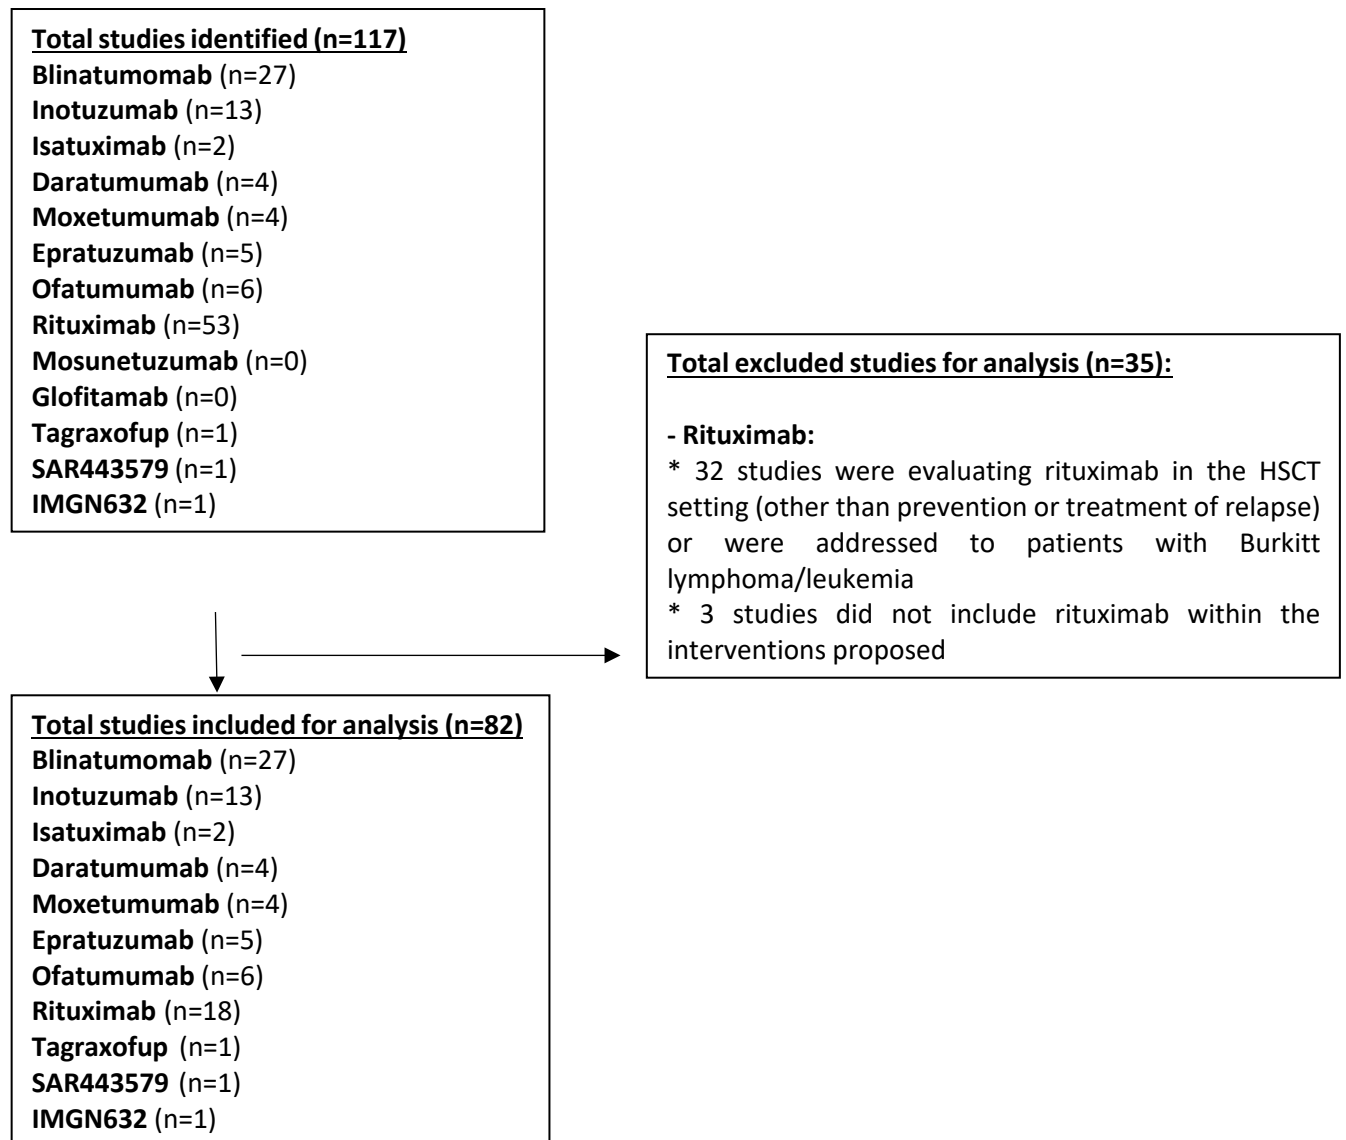

CART: Chimeric antigen receptor therapies; GVHD: Graft versus host disease; HSCT: Hematopoietic stem cell transplantation

**Supplementary Table 1.** List of all studies identified through the search at clinicaltrials.gov (see excel file)
